# Supplementary figures and images for: Gut-focused hypnotherapy for children and adolescents with irritable bowel syndrome
Source: PubMed Central journal article supplement — Frontline Gastroenterol. 2020 Nov 23;12(7):570–7. doi: 10.1136/flgastro-2020-101679 (PMC8640435; doi:10.1136/flgastro-2020-101679), 2020-11-23

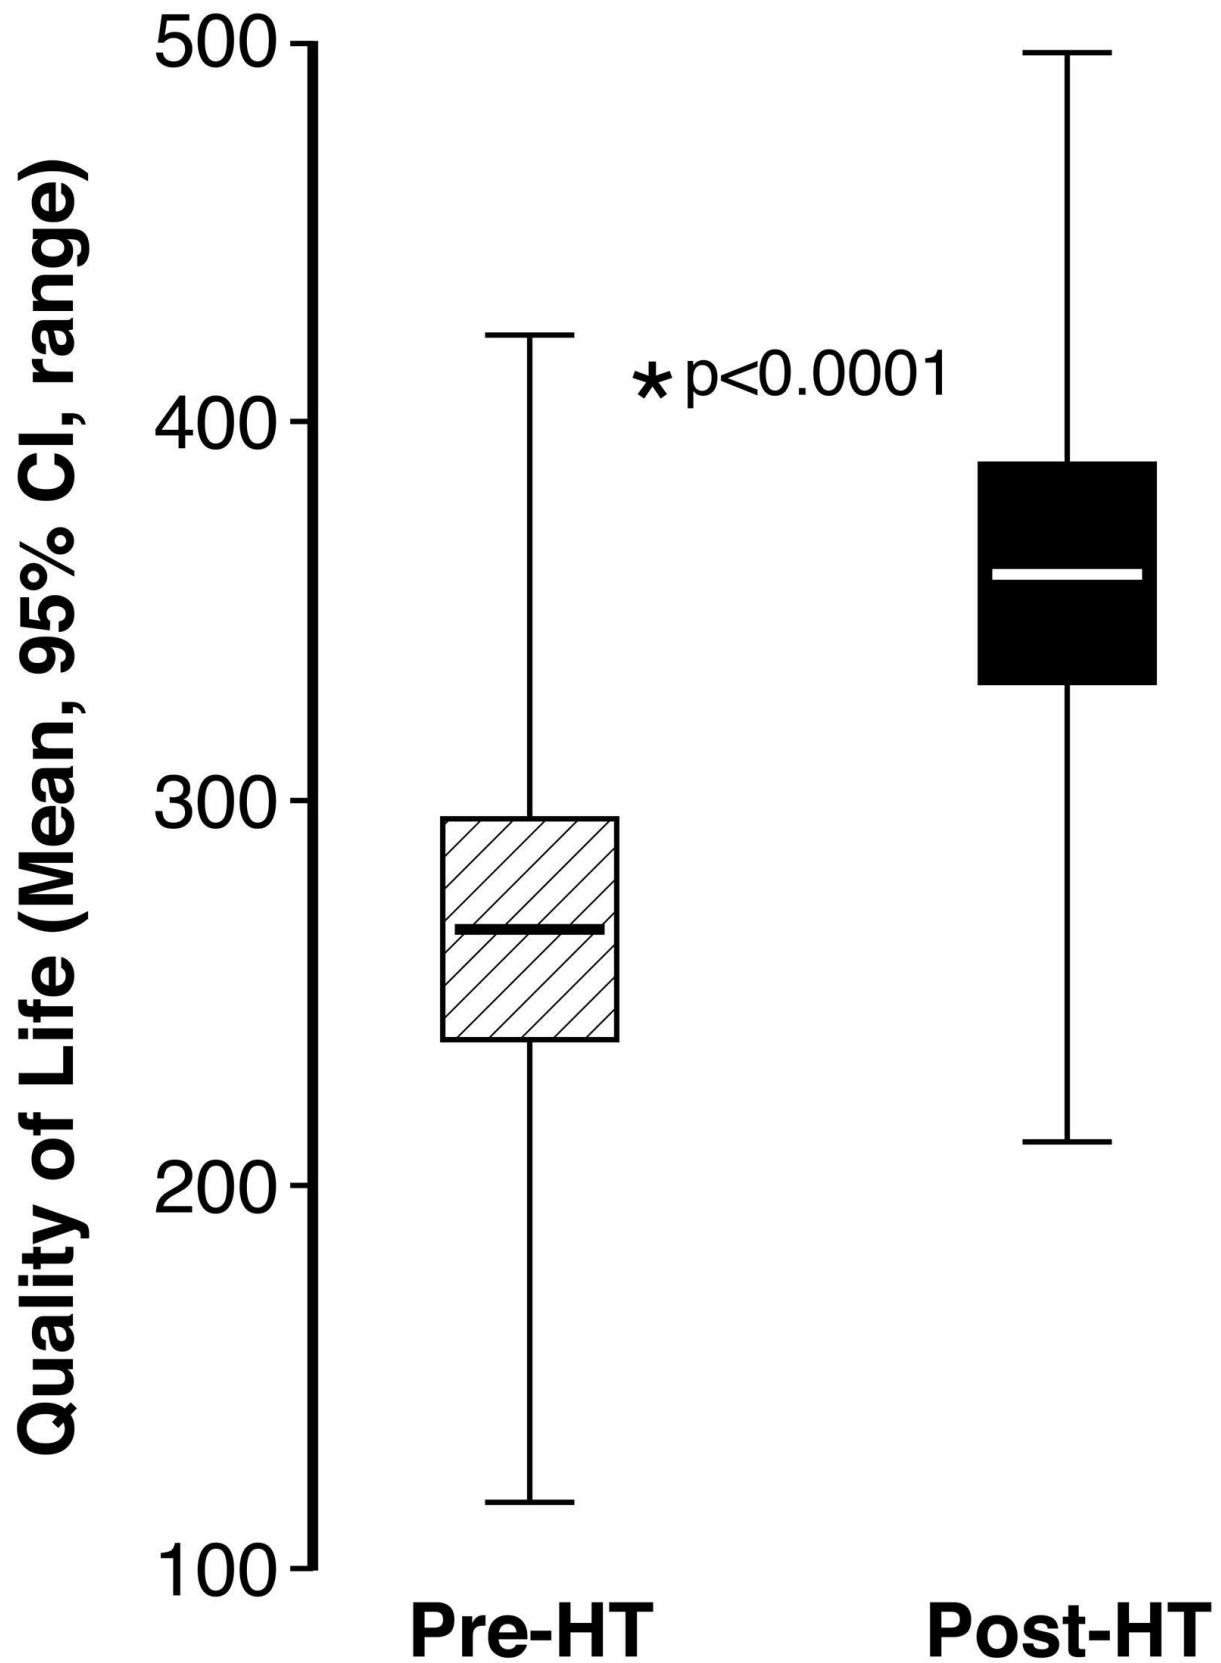

Supplement: flgastro-2020-101679supp001.pdf [file flgastro-2020-101679supp001.pdf]

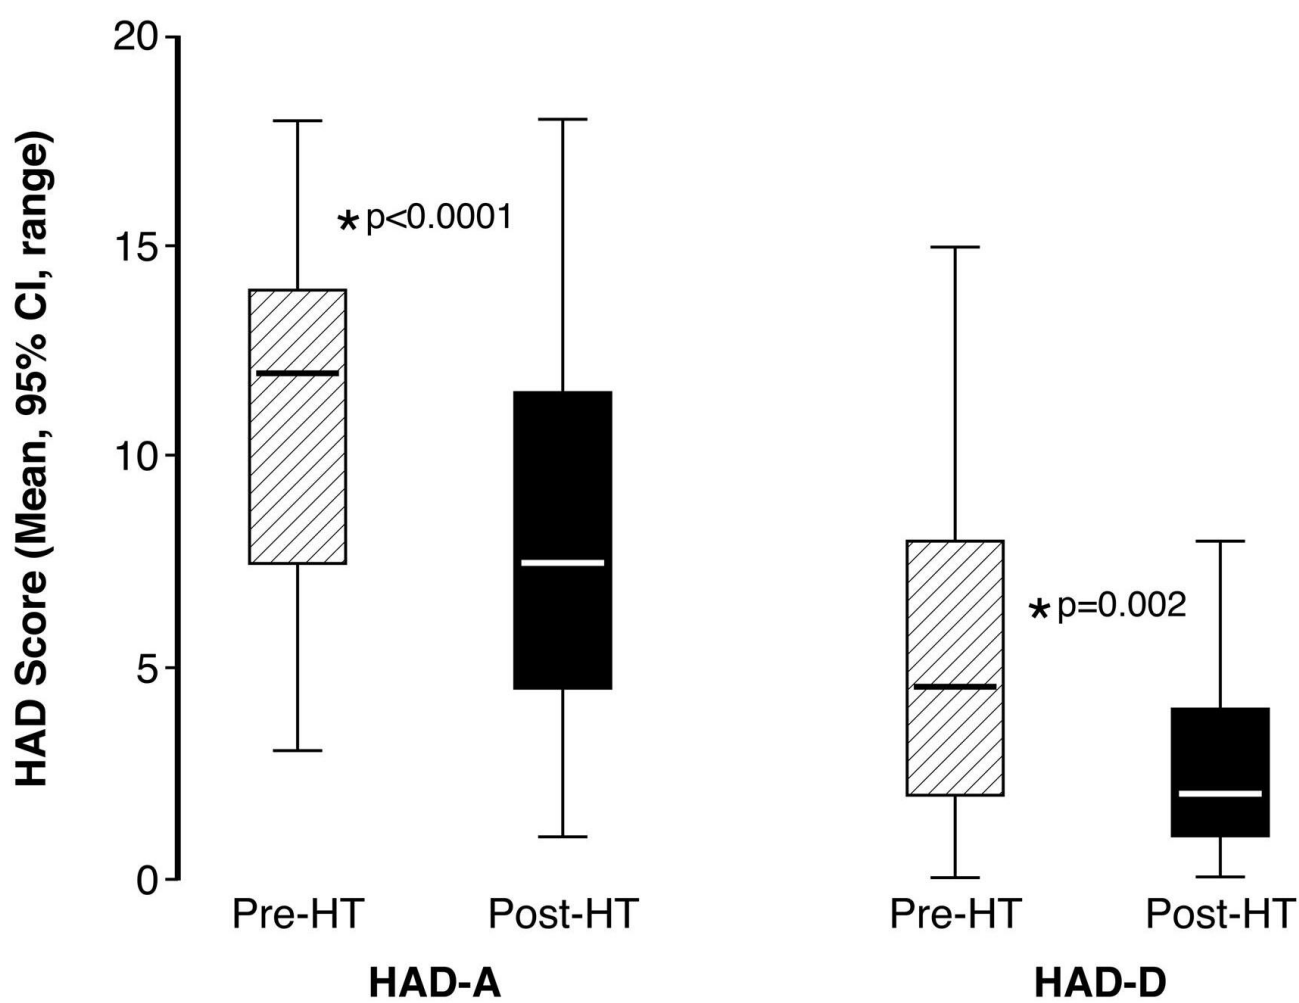

Supplement: flgastro-2020-101679supp002.pdf [file flgastro-2020-101679supp002.pdf]
